# Supplementary material for: Development of the Novel Bifunctional Fusion Protein BR102 That Simultaneously Targets PD-L1 and TGF-β for Anticancer Immunotherapy
Source: MDPI journal article supplement (doi:10.3390/cancers14194964), 2022-10-10
Supplement: s1 [file s1]

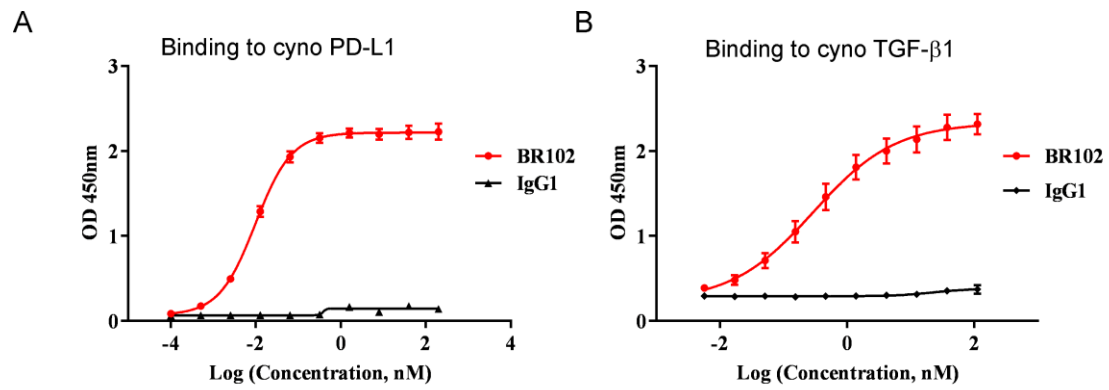

**Figure S1.** Binding of BR102 to cynomolgus monkey PD-L1 and TGF- $\beta$ 1 were assessed by ELISA.

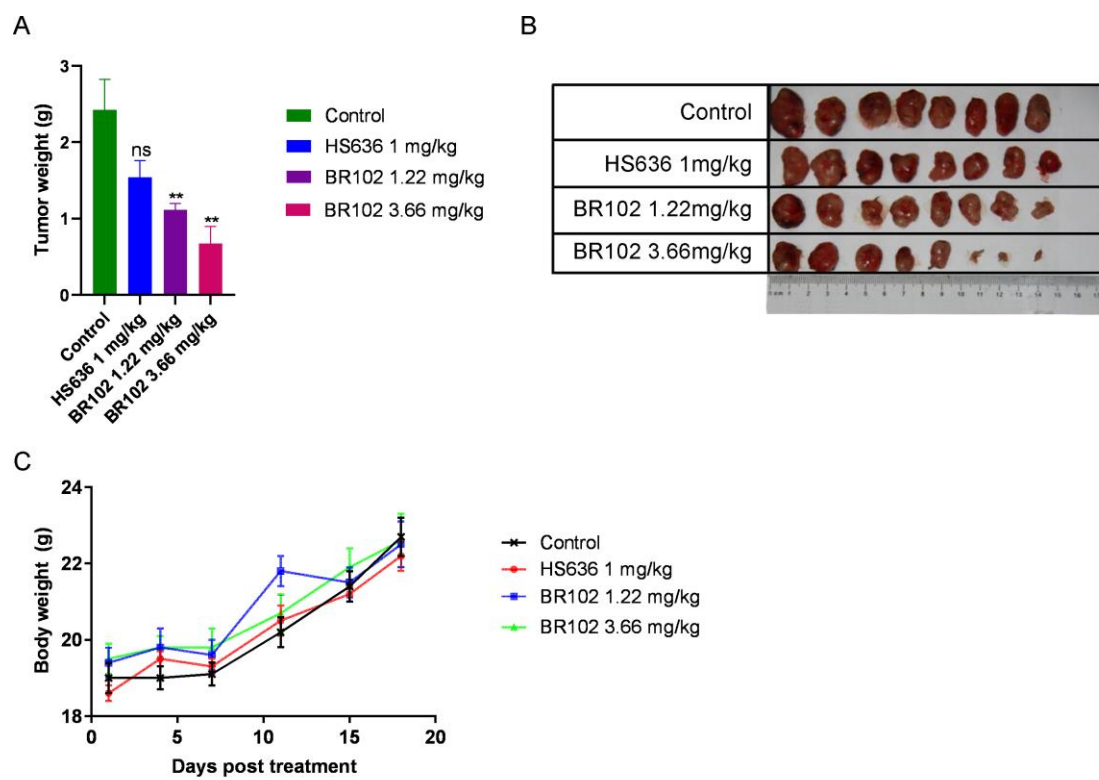

**Figure S2.** Tumor weights (**A**), tumor images (**B**) and body weights (**C**) of MC38/hPD-L1-bearing mice treated with HS636 or BR102. \*Indicate statistical differences compared with the control group. \*\*  $p < 0.01$ ; ns, not significant.
